# Supplementary material for: All-optical observation and reconstruction of spin wave dispersion
Source: PubMed Central journal article supplement (PMC5477491; doi:10.1038/ncomms15859), 2017-06-12
Supplement: ncomms15859-s3.pdf [file ncomms15859-s3.pdf]

**Editorial Note:**

*This manuscript has been previously reviewed at another journal that is not operating a transparent peer review scheme. This document only contains reviewer comments and rebuttal letters for versions considered at Nature Communications.*
